# Supplementary material for: Pharmaceutical Interventions for Inpatients with Liver Cirrhosis and Liver Transplantation: A Systematic Review of Experimental Studies
Source: MDPI journal article supplement (doi:10.3390/jcm12227030), 2023-11-10
Supplement: s1 [file s1]

# Pharmaceutical Interventions for Inpatients with Liver Cirrhosis and Liver Transplantation: A Systematic Review of Experimental Studies

Nagham Jibai <sup>1</sup>, Alexander Koch <sup>2</sup>, Tom Florian Ulmer <sup>3</sup>, Pia Erdmann <sup>1</sup>, Joachim Andreas Koeck <sup>4</sup> and Albrecht Eisert <sup>1,5,\*</sup>

<sup>1</sup> Hospital Pharmacy, RWTH Aachen University Hospital, 52074 Aachen, Germany; njibai@ukaachen.de (N.J.); pierdmann@ukaachen.de (P.E.)

<sup>2</sup> Department of Internal Medicine III, RWTH Aachen University Hospital, 52074 Aachen, Germany; akoch@ukaachen.de

<sup>3</sup> Department of General, Visceral and Transplantation Surgery, RWTH Aachen University Hospital, 52074 Aachen, Germany; fulmer@ukaachen.de

<sup>4</sup> Hospital Pharmacy, Erlangen University Hospital, 91054 Erlangen, Germany; joachim.koeck@uk-erlangen.de

<sup>5</sup> Institute of Clinical Pharmacology, RWTH Aachen University Hospital, 52074 Aachen, Germany

\* Correspondence: aeisert@ukaachen.de

| Database | Search term                                                                                                                                                                                                                                                                                                                                                                                                                                                                                                                                                                                                                                                                                                                                                                                                                                                                          |
|----------|--------------------------------------------------------------------------------------------------------------------------------------------------------------------------------------------------------------------------------------------------------------------------------------------------------------------------------------------------------------------------------------------------------------------------------------------------------------------------------------------------------------------------------------------------------------------------------------------------------------------------------------------------------------------------------------------------------------------------------------------------------------------------------------------------------------------------------------------------------------------------------------|
| Medline  | "Liver cirrhosis"[MeSH Terms] OR "Liver Transplantation"[MeSH Terms] OR ("liver*" [Title/Abstract] AND "cirrhos*" [Title/Abstract]) OR ("liver" [Title/Abstract] AND "transplant*" [Title/Abstract]) AND ("pharmacists"[MeSH Terms] OR "pharmaceutical services"[MeSH Terms] OR "pharmacist*" [Title/Abstract] OR "transplant pharmacist" [Title/Abstract] OR "Medicines Management" [Title/Abstract] OR "Medicines Optimisation" [Title/Abstract] OR "Medicines Optimization" [Title/Abstract])                                                                                                                                                                                                                                                                                                                                                                                     |
| Embase   | ('liver transplantation'/exp OR 'liver'/exp OR 'liver disease'/exp) AND ('pharmacist'/exp OR 'clinical pharmacy'/exp OR 'hospital pharmacy'/exp)                                                                                                                                                                                                                                                                                                                                                                                                                                                                                                                                                                                                                                                                                                                                     |
| CENTRAL  | <p>ID      Search</p> <p>#1      MeSH descriptor: [Liver Transplantation] explode all trees</p> <p>#2      ("liver transplant" or "liver transplantation" or "hepatic transplantation"):ti,ab,kw (Word variations have been searched)</p> <p>#3      MeSH descriptor: [Liver Cirrhosis, Biliary] explode all trees</p> <p>#4      ("liver" AND "cirrhosis"):ti,ab,kw (Word variations have been searched)</p> <p>#5      MeSH descriptor: [Pharmacists] explode all trees</p> <p>#6      MeSH descriptor: [Professional-Patient Relations] explode all trees</p> <p>#7      ("pharmacist"):ti,ab,kw OR (clinical pharmacist):ti,ab,kw OR (hospital pharmacist):ti,ab,kw OR ("pharmacare"):ti,ab,kw OR ("medication therapy management"):ti,ab,kw (Word variations have been searched)</p> <p>#8      #1 OR #2 OR #3 OR #4</p> <p>#9      #5 OR #6 OR #7</p> <p>#10     #8 AND #9</p> |

**Supplement Table S1.** Search terms that were used for this systematic review, adapted to each database.

|   |                                                               |
|---|---------------------------------------------------------------|
| 1 | No author details and/or abstract available                   |
| 2 | Duplicate                                                     |
| 3 | Meeting/ Conference abstract/ Case report                     |
| 4 | outpatient setting                                            |
| 5 | Does not include Liver transplant/ Cirrhotic patients         |
| 6 | Includes pediatric patients not separated from adult patients |
| 7 | Does not include DRP                                          |
| 8 | Does not include pharmacist intervention                      |
| 9 | Other, specify                                                |

**Supplement Table S2.** Nine exclusion criteria for abstract screening. DRP= Drug-related problem.
